# Supplementary material for: Identification and Characterization of MicroRNAs in Small Brown Planthopper (Laodephax striatellus) by Next-Generation Sequencing
Source: PLoS One. 2014 Jul 24;9(7):e103041. doi: 10.1371/journal.pone.0103041 (PMC4109989; doi:10.1371/journal.pone.0103041)
Supplement: Table S1 — Conserved mature miRNAs and miRNA families identified in L. striatellus . (XLSX) [file pone.0103041.s003.xlsx]

## Sheet: Sheet1
	Table S1. Conserved mature miRNAs and miRNA families identified in L. striatellus
	MiRNA family	Conserved miRNA name	miR sequence (5'->3')	miR length (nt)	Highest miR Reads	Total miR Reads
	bantam	lst-bantam-3p	TGAGATCATTGTGAAAGCTGAT	22	23565	62655
		lst-miR-81a	TGAGATCATTGTGAAAGCTGT	21	49	69
	let-7	lst-let-7-3p	CTGTACAGCCTGCTAACTTTCCT	24	436	623
		lst-let-7b	TGAGGTAGTAGGTTGTGTGGTTA	24	1	1
		lst-let-7g	TGAGGTAGTAGGTTGTATAGT	21	9066	14134
		lst-let-7j	TGAGGTAGTAGTTTGTGCTGT	22	1	1
	miR-1	lst-miR-1-5p	CCGTGCTTCCTTACTTCCCATAA	23	3070	4076
		lst-miR-1a-3p	ATGGAATGTAAAGAAGTA	18	3	13
		lst-miR-1b	TGGAATGTAAAGAAGTATGGAG	22	1645	2190
		lst-miR-1c-3p	TGGAATGTAAAGAAGTATGGT	21	3	3
	miR-2	lst-miR-2a-2-5p	GTCAAAATGGTTGTGAAATG	20	2	2
		lst-miR-2b	TCACAGCCAGCTTTGATGAGCA	22	4489	19325
		lst-miR-2a-3p	TATCACAGCCAGCTTTGATGAGCT	24	69	115
		lst-miR-13a	TATCACAGCCATTTTGATGA	20	1	1
		lst-miR-13b	TATCACAGCCACTTTGATGA	20	833	1362
		lst-miR-13b-2-5p	CGTCAAAATGGCTGTGAGTTATG	23	15	21
	miR-7	lst-miR-7-5p	TGGAAGACTAGTGATTTTGTTGTT	24	1633	3601
		lst-miR-7b	TGGAAGACTAGTGATTGTTGT	21	2	2
	miR-8	lst-miR-8-3p	TAATACTGTCAGGTAAAGATGTC	23	57699	98972
		lst-miR-8-5p	CATCTTACCGGGCAGCATTAGA	22	5462	6974
		lst-miR-200b	TAATACTGTCAGGTAATGATG	21	10233	10648
	miR-9	lst-miR-9	TCTTTGGTTATCTAGCTGTGTGA	23	2	5
		lst-miR-9-5p	TCTTTGGTTATCTAGCTGTAGG	22	2	2
		lst-miR-9a-3p	ATAAAGCTAGGTTACCGAAGTTA	23	541	776
		lst-miR-9a-5p	TCTTTGGTTATCTAGCTGTATGA	23	3727	8744
		lst-miR-9b-5p	TCTTTGGTGATGTAAGCTGTAT	22	601	994
		lst-miR-9c-5p	TCTTTGGTATGCTAGCTGAAG	21	190	499
		lst-miR-9e-5p	TCTTTGGTTATCTAGTTGTATGA	23	2	2
		lst-miR-79-5p	TCTTTGGTTATCTGGCTGTATGA	23	2	4
		lst-miR-79-3p	ATAAAGCTATATTACCAAAGCA	22	6	10
	miR-10	lst-miR-10-3p	CAAATTCGGTTCTAGAGAGGTTT	23	222	472
		lst-miR-10-5p	TACCCTGTAGATCCGAATTTGT	22	8609	11672
		lst-miR-10b	TACCCTGTAGAACCGAATTTGG	22	1	2
		lst-miR-10c-5p	TACCCTGTAGATTCGAATTTGT	22	1	2
		lst-miR-10	AACCCTGTAGATCCGAATT	19	1	1
		lst-miR-993	CTACCCTGTAGATCCGGGCTTATT	24	1	3
	miR-12	lst-miR-12-5p	AGAGTATTATATCAGGTACTGGT	23	40	45
	miR-14	lst-miR-14-3p	TCAGTCTTTTTCTCTCTCCTAT	22	4490	10856
		lst-miR-14b-3p	TCAGTCTTTTTCTCTCTCCT	20	3969	4010
	miR-21	lst-miR-21	TAGCTTATCAGACTGATGTTGA	22	12	14
	miR-22	lst-miR-22b	AAGCTGCCAGTTGAAGAACTGT	22	22	24
		lst-miR-745-3p	CAGCTGCCCAGTGAAGGGCTGT	22	1	1
	miR-26	lst-miR-26b	TTCAAGTAATCCAGGATAGGCT	22	2	3
	miR-27	lst-miR-27d-3p	TTCACAGTGGCTAAGTTCC	19	1	1
		lst-miR-27e	TTCACAGTGGCTAAGTTCTG	20	14	15
	miR-28	lst-miR-28	CACTAGATTGTGAGCTCCTGGAA	23	2	3
	miR-29	lst-miR-29b	TAGCACCATTTGAAATTAGTG	21	36	47
	miR-30	lst-miR-30b	TGTAAACATCCCCGACTGGA	20	1	2
		lst-miR-30e-3p	TTTCAGTCGGATGTTTGCAG	20	1	1
		lst-miR-30e-5p	TGTAAACATCCTCGACTGGAAGCT	24	3	13
	miR-31	lst-miR-31	AGGCAAGATGTCGGCATGGCTGA	23	1720	3230
	miR-34	lst-miR-34-5p	TGGCAGTGTGGTTAGCTGGTTGT	23	71450	228615
		lst-miR-34b-5p	TGGCAGTGTGCTTAGCTGGTT	21	58737	63368
		lst-miR-34	GGGCAGTGTGGTTAGCTGGTT	21	11	21
	miR-39	lst-miR-39-3p	CACCGGGTGTAAATCAGCTTG	21	3	9
	miR-71	lst-miR-71-3p	TCTCACTACCTTGTCTTTCATG	22	1813	2124
		lst-miR-71a-5p	TGAAAGACATGGGTAGTGAGAT	22	334	990
	miR-72	lst-miR-72-5p	AGGCAAGATGTCGGCATAGCTGA	23	2	8
	miR-82	lst-miR-82	TGAGATCATTGTGAAAGC	18	3843	3940
	miR-87	lst-miR-87b-3p	GTGAGCAAAGTTTCAGGTGTGT	22	1942	2022
		lst-miR-87-3p	TTGAGCAAAGTTTCAGGTGTGT	22	3	3
		lst-miR-87a	GTGAGCAAAGTTTCAGGTGTG	21	1	1
		lst-miR-87b-3p	GTGAGCAAAGTTTCAGGTG	19	24	29
	miR-92	lst-miR-92a-3p	TATTGCACTTGTCCCGGCCTAT	22	579	1207
		lst-miR-25	CATTGCACTTGTCTCGGTCTGA	22	1	2
		lst-miR-92	AATTGCACTTGTCCCGGCCTT	21	3	3
		lst-miR-92b	TATTGCACTCGTCCCGGCCTCC	22	1	1
		lst-miR-92b-3p	AATTGCACTTGTCCCGGCCTGC	22	5416	9453
	miR-99	lst-miR-99b	CACCCGTAGAACCGACCTTG	20	1	1
		lst-miR-99b-5p	AACCCGTAGATCCGAACTTGGGG	23	16	27
		lst-miR-100	AACCCGTAGATCAGAACT	18	1	1
		lst-miR-100a-5p	AACCCGTAGATCCGAACTTGTGTC	24	8	12
		lst-miR-100-5p	AACCCGTAGATCCGAACTTGTG	22	9188	15314
		lst-miR-122-5p	TGGAGTGTGACAATGATGTTT	21	1	1
	miR-107	lst-miR-107b	AGCAGCATTGTACAGGGC	18	1	1
	miR-124	lst-miR-124-3p	TAAGGCACGCGGTGAATGCCA	21	46	101
		lst-miR-124-5p	CGTGTTCACTGTTGGCCT	18	1	2
		lst-miR-124a-3p	TAAGGCACGCGGTGAATGC	19	2	2
		lst-miR-124b	TAAGGCACGCAGTGAATGCCA	21	1	1
		lst-miR-124b-3p	TAAGGCACGCGGTGAATGAC	20	1	1
	miR-125	lst-miR-125-5p	TCCCTGAGACCCTAATTTGTGA	22	2812	5153
		lst-miR-125c	CCTGAGACCCTAATTTGTG	19	3	4
	miR-126	lst-miR-126-5p	CATTATTACTTTTGGTACGCG	21	2	2
	miR-127	lst-miR-127	TCGGATCCGTCTGAGCTTGGCT	22	1	4
	miR-130	lst-miR-130c-3p	CAGTGCAATGTTAAAAGGGC	20	2	2
	miR-132	lst-miR-132-3p	TAACAGTCTACAGCCATGGTCG	22	1	1
	miR-133	lst-miR-133-3p	TTGGTCCCCTTCAACCAGCTGT	22	6434	8349
		lst-miR-133a	TTGGTCCCCTTCAACCAGTTGT	22	2	2
		lst-miR-133a-3p	TTGGTCCCCCTCAACCAGCTGT	22	1	1
		lst-miR-133b-3p	TTTGGTCCCCTTCAACCAGCT	21	37	42
		lst-miR-133c	TTGGTCCCCTTCAACCGGCTGT	22	4	4
	miR-137	lst-miR-137-3p	TATTGCTTGAGAATACACGTAG	22	22	60
		lst-miR-137b-3p	TTATTGCTTGAGAATACGCGTGG	23	8	12
	miR-141	lst-miR-141-3p	TAACACTGTCAGGTAAAGATG	21	3	3
	miR-143	lst-miR-143-3p	TGAGATGAAGCACTGTAGCT	20	5	7
	miR-146	lst-miR-146a	TGAGAACTGAATTCCATGGGTTG	23	2	3
	miR-148	lst-miR-148a-3p	TCAGTGCACTACAGAACTTTGT	22	4	4
	miR-150	lst-miR-150-5p	TCTCCCAACCCTTGTACCAGTGG	23	1	1
	miR-151	lst-miR-151	CTAGACTGAAGCTCCTTGAGGA	22	1	2
		lst-miR-151-3p	CTAGACTGAAGCTCCTTGAGGT	22	1	2
	miR-153	lst-miR-153	TTGCATAGTCACAAAAGTGATG	22	1	2
		lst-miR-153c	TTGCATAGTCACAAAAGTGATC	22	1	2
	miR-181	lst-miR-181c	AACATTCAACGCTGTCGGTGAG	22	3	4
	miR-184	lst-miR-184-3p	CGGACGGAGAACTGATAAGGGC	22	16540	42840
		lst-miR-184b	GGACGGAGAACTGATAAGGG	20	9	14
		lst-miR-184	TCTGGACGGAGAACTGATAAGGGC	24	1	1
		lst-miR-184-5p	CCTTATCATTCTCTCGGCCAGT	22	1	1
	miR-190	lst-miR-190-5p	AGATATGTTTGATATTCTTGGTTG	24	816	1661
	miR-191	lst-miR-191-5p	CAACGGAATCCCAAAAGCAGCTG	23	9	10
	miR-193	lst-miR-193-3p	TACTGGCCTGCTAAGTCCCAAG	22	291	416
		lst-miR-193b	ACTGGCCCTCAAAGTCCCGCT	21	1	1
	miR-199	lst-miR-199a-3p	ACAGTAGTCTGCACATTAGTTA	22	1	2
		lst-miR-199b-3p	ACAGTAGTCTGCACATTGG	19	1	1
	miR-200	lst-miR-200b-5p	CATCTTACTGGGCAGCATTAGA	22	1	2
	miR-210	lst-miR-210-3p	CTTGTGCGTGTGACAGCGGCT	21	1166	2143
		lst-miR-210-5p	AGCTGCTGGACACTGCACAAGA	22	52	182
	miR-219	lst-miR-219-5p	TGATTGTCCAAACGCAATTCTTG	23	3	7
	miR-221	lst-miR-221	AGCTACATTGTCTGCTGGGT	20	1	1
	miR-223	lst-miR-223-3p	TGTCAGTTTGTCAAATACCCCAA	23	1	1
	miR-252	lst-miR-252a	CTAAGTACTGGTGCCGTA	18	3	4
	miR-263	lst-miR-263b	AATGGCACTGGAAGAATTC	19	16	16
	miR-275	lst-miR-275	TCAGGTACCTGAAGTAGCGCGCG	23	7891	12359
		lst-miR-275-5p	TCAGGTACCTGAAGTAGCGC	20	42	46
	miR-276	lst-miR-276-3p	TAGGAACTTCATACCGTGCTT	21	4115	7055
		lst-miR-276a-5p	AGCGAGGTATAGAGTTCCTACG	22	1812	2089
		lst-miR-276	TAGGAACTTCATACCATGCTTT	22	2	2
		lst-miR-276-5p	AGCGAGGTATAGAGTTCCTACT	22	11	14
		lst-miR-276b	TAGGAACTTAATACCGTGCTT	21	2	4
	miR-277	lst-miR-277	TAAATGCACTATCTGGTACG	21	47	75
	miR-278	lst-miR-278-3p	TCGGTGGGACTTTCGTCCGTCT	22	12885	15033
		lst-miR-278	TCGGTGGGACTTTCGTACGTCT	22	3	3
	miR-279	lst-miR-279d	TGACTAGATCCTTACTCGTCTG	22	2538	5521
		lst-miR-279	TGGGTGGGGGTCTAGTGTTG	22	1	1
		lst-miR-996	TGACTAGAGTTACACTCGTCA	21	11	19
	miR-281	lst-miR-281-5p	AAGAGAGCTATCCGTCGACAGT	22	40870	65354
		lst-miR-281-3p	CTGTCATGGAGTTGCTCTCTT	21	353	1306
		lst-miR-281	TGTCATGGAGTTGCTCTCTTTAT	23	25	35
		lst-miR-281-1-5p	AAGAGAGCTGTCCGTCGACAGT	22	3	3
	miR-305	lst-miR-305-5p	ATTGTACTTCATCAGGTGCT	20	1914	3310
	miR-306	lst-miR-306	ACAGGTACTGAGTGACTCTGAG	22	3315	6128
	miR-307	lst-miR-307-3p	CACAACCTCCTTGAGTGAGCGA	22	72	240
		lst-miR-307	CACAACCTCCTTGAGTGAGCGT	22	7	7
	miR-315	lst-miR-315	TTTTGATTGTTGCTCAGAAAGCC	23	232	416
	miR-316	lst-miR-316-5p	TGTCTTTTTCCGCTTTGCTGCCG	23	1126	3087
	miR-317	lst-miR-317-3p	TGAACACAGCTGGTGGTATCT	21	10187	12981
		lst-miR-317	TGAACACATCTGGTGGTATCT	21	3	3
	miR-320	lst-miR-320b	AAAAGCTGGGTTGAGAGGGCGA	22	3	3
	miR-370	lst-miR-370-3p	CCTGCTGGGGTGGAACCTGGTC	22	1	1
	miR-375	lst-miR-375-3p	CTTGTTCGTTCGGCTCGAGT	20	1	2
		lst-miR-375b-3p	TTTGTTCGTTCGGCTCGAGTT	21	1	4
	miR-381	lst-miR-381-3p	ATATACAAGGGCAAGCTCTCT	21	1	1
	miR-409	lst-miR-409-3p	CGAATGTTGCTCGGTGAACC	20	1	1
	miR-423	lst-miR-423-5p	TGAGGGGCAGAGAGCGAGAC	20	1	1
	miR-424	lst-miR-424	CAAAACGTGAGGCGCTGCT	19	1	1
	miR-449	lst-miR-449	TGGCAGTGTTGTTAGCTGGTTG	22	4	6
	miR-450	lst-miR-450b-5p	TTTTGCAATATGTTCCTGAAT	21	1	1
		lst-miR-484	TCAGGCTCAGTCCCCTCCCGAT	22	1	1
		lst-miR-486	TCCTGTACTGAGCTGCCCCGAG	22	30	66
		lst-miR-509b	TGATTGGTACGTCTGTGGGTAGA	23	1	3
		lst-miR-716b	CAGATCTTGGTGGTAGTAGCAAAT	24	168	787
		lst-miR-750	CCAGATCTAACTCTTCCAGCTCA	23	1687	2975
	miR-737	lst-miR-737	CAAGAAAATCAAAACCTAGA	20	2	2
	miR-927	lst-miR-927a	TTTAGAATTCCTACGCTTTGCC	22	129	251
		lst-miR-927	CAAAGCGTTTGACTTCTGAAA	21	2	3
		lst-miR-927a-5p	TTTAGAATTCCTACGCTTTAC	21	54	104
	miR-929	lst-miR-929-5p	AAATTGACTCTAGTAGGGAGT	21	43	71
		lst-miR-929	AAATTGACTCTAGTAGGGAGTAA	23	2	2
		lst-miR-929-3p	CTCCCTAATGGAGTCAGATTGAT	23	1	1
	miR-932	lst-miR-932-5p	TCAATTCCGTAGTGCATTGCAGT	23	21	32
	miR-965	lst-miR-965-3p	TAAGCGTATAGCTTTTCCCCTT	22	16	29
	miR-971	lst-miR-971	TTGGTGTTCTACCTTACAGTG	21	6	14
	miR-981	lst-miR-981-3p	TTCGTTGTCGACGAAACT	18	4	7
	miR-1000	lst-miR-1000-5p	ATATTGTCCTGTCACAGCAGTA	22	95	241
	miR-1175	lst-miR-1175	TGAGATTCACTCCTCCTACTTAC	23	220	260
	miR-1260	lst-miR-1260b	ATCCCACCGCTGCCACCA	18	1896	2944
	miR-1357	lst-miR-1357	ATTATGAGAGCTGAGGGC	18	202	775
	miR-1323	lst-miR-1323	TCAAAACTGAGGGGCATTTTCT	22	5	6
	miR-1587	lst-miR-1587	CGGGCTGGGCTGGGCTGGGC	20	1	1
	miR-1692	lst-miR-1692	GTAGCTCAGATGGTAGAG	18	21	133
	miR-2478	lst-miR-2478	TCGTATCCCACTTCTGACACCA	22	110	192
	miR-2765	lst-miR-2765	TGGTAACTCCACCACCGTTGGC	22	3486	5464
	miR-2788	lst-miR-2788-3p	CAATGCCCTTAGAAATCCCAAA	22	60	82
	miR-2796	lst-miR-2796-3p	GTAGGCCGGCGGAAACTACTTGC	23	4407	7381
		lst-miR-2796-5p	AGGGGTTTCTTTCGGCCTCCAG	22	3	4
	miR-3049	lst-miR-3049-3p	TCCGTCCAACTCCTTTCCGTCT	22	190	292
		lst-miR-3049-5p	TCGGGAAGGCAGTTGCGGCGGAT	23	212	384
		lst-miR-3096a-5p	TGGCCAAGGATGAGGACT	18	1	1
	miR-3151	lst-miR-3151-3p	CCTGATCCCGCACCCACC	18	1	1
	miR-3931	lst-miR-3931	TACTTTGAGTCGGTACGAATCCT	23	16	16
	miR-4020	lst-miR-4020b-5p	TGGCAGTGTGGTTAGTTGGT	20	4203	4626
	miR-4171	lst-miR-4171-5p	GACTCTCTTAAGGTAGCCA	19	11	79
	miR-4510	lst-miR-4510	TGAGGGAGTAGGATGTATAGT	21	1	1
	miR-5097	lst-miR-5097	GGGTTCATGTCCCTGTTCGGGCGC	24	46	90
	miR-5106	lst-miR-5106	AGGTCTGTAGCTCAGTTGG	19	1	1
	miR-5119	lst-miR-5119	TCATCTCATCCTGGGGCT	18	3	11
	miR-5305	lst-miR-5305	TGGGCTTGAAGATTAGCTTAGA	22	1	1
	miR-5309	lst-miR-5309	CAATGCCCAAGGAAACCCCGAA	22	7	12
	miR-5312	lst-miR-5312	TGGCTGAACATTGTTATGCGT	21	1	1
	miR-5455	lst-miR-5455-5p	TGAAAAAGAACTCCCTAGTT	20	1	1
	miR-5978	lst-miR-5978	TTCGAGACTAGAGTCACT	18	1	1
	miR-6496	lst-miR-6496-5p	GCCCAGCGCTGAATCCCGT	19	90	164
	miR-6497	lst-miR-6497-3p	ATGCGGCCGGTGCCGGGC	18	1	2
		lst-miR-6497-5p	TTGGCTCTGAGGATCGGGGCGTGT	24	822	5727
	miR-6829	lst-miR-6829-5p	TGGGCTGCTGAAAGTGGGA	19	1	1
	miR-7006	lst-miR-7006-3p	TTTCTGACCCGGAATCCCGAG	21	1	1
	miR-7404	lst-miR-7404-3p	TTGAAGACGGCCGGGGACTGGT	22	5	5
	miR-7934	lst-miR-7934-3p	CAATGCCCTTAGAAATCCCA	20	2	2
	miR-7977	lst-miR-7977	GTTTCCCAGCCATCGCACCA	20	3	8
	miR-8112	lst-miR-8112	TCTCCGCCGACGTCCACCGCA	21	3	7
	miR-iab	lst-miR-iab-4-5p	ACGTATACTGAATGTATCC	19	6	7
		lst-miR-iab-8-5p	TTACGTATACTGAAGGTAT	19	1	1
	miR-m0006	lst-miR-m0006	CGGATGAGACGAGGTAGGTGAGA	23	1	2
	miR-m0009	lst-miR-m0009	TTGGTGTGAAATCCTGGCACG	21	2	2
	miR-m0010	lst-miR-m0010	AAAGAAGTCGCATACTGAGAGGTCTG	26	4	4
	miR-m0011	lst-miR-m0011	CTGGCTTTAGGAAATCCGGCAT	22	3	12
	miR-m0019	lst-miR-m0019	TTCGTCAAATGGGCTGGGACA	21	1	3
	miR-m0022	lst-miR-m0022	TCGAGAACCCCTGCCAGCCCTGA	23	128	327
	miR-m0023	lst-miR-m0023	TAATACCGGCGAACAGAATGCC	22	24	39
	miR-m0025	lst-miR-m0025	TTCAAGAGAGCCCTGCGGACAG	22	379	552
